# Supplementary material for: Regular Patterns for Proteome-Wide Distribution of Protein Abundance across Species
Source: PLoS One. 2012 Mar 9;7(3):e32423. doi: 10.1371/journal.pone.0032423 (PMC3302874; doi:10.1371/journal.pone.0032423)
Supplement: Table S1 — Rank sum test p -values between origin time categorized proteins' abundance datasets. (DOC) [file pone.0032423.s006.doc]

| **Supplementary Table 1. Rank sum test *p*-values between origin time categorized proteins’ abundance datasets.** |
| --- |
| | <1.00 Gya | <1.00 Gya |  |  | *H. sapiens* (Liver) | | | --- | --- | --- | --- | --- | --- | | 1.00~1.58 Gya | 0.0316 | 1.00~1.58 Gya |  | | 1.58~1.84 Gya | 0.4405 | 0.3557 | 1.58~1.84 Gya |  |  | | 1.84~2.23 Gya | 0.6618 | 0.0089 | 0.2443 | 1.84~2.23 Gya |  | | 2.23~4.00 Gya | 6.6019×10-6 | 3.9039×10-10 | 3.4190×10-6 | 2.0242×10-5 | 2.23~4.00 Gya | | >4.00 Gya | 1.3050×10-22 | 2.7880×10-32 | 3.5180×10-20 | 4.4276×10-23 | 6.4836×10-6 | |
| | <1.00 Gya | <1.00 Gya |  |  | *M. musculus* (Renal cortex) | | | --- | --- | --- | --- | --- | --- | | 1.00~1.58 Gya | 0.0905 | 1.00~1.58 Gya |  | | 1.58~1.84 Gya | 0.6213 | 0.0393 | 1.58~1.84 Gya |  |  | | 1.84~2.23 Gya | 0.6242 | 0.1527 | 0.2703 | 1.84~2.23 Gya |  | | 2.23~4.00 Gya | 0.0016 | 3.2565×10-7 | 0.0146 | 2.0305×10-5 | 2.23~4.00 Gya | | >4.00 Gya | 4.5169×10-8 | 2.7613×10-15 | 9.6832×10-7 | 1.3890×10-13 | 0.0054 | |
| | <1.00 Gya | <1.00 Gya |  |  | *M. musculus* (Liver) | | | --- | --- | --- | --- | --- | --- | | 1.00~1.58 Gya | 1.4659×10-4 | 1.00~1.58 Gya |  | | 1.58~1.84 Gya | 0.1750 | 0.0977 | 1.58~1.84 Gya |  |  | | 1.84~2.23 Gya | 0.9874 | 9.5387×10-4 | 0.2698 | 1.84~2.23 Gya |  | | 2.23~4.00 Gya | 4.6242×10-7 | 4.4111×10-13 | 3.1737×10-6 | 1.9757×10-5 | 2.23~4.00 Gya | | >4.00 Gya | 3.1254×10-34 | 8.9230×10-47 | 2.4582×10-24 | 2.4548×10-26 | 1.4056×10-6 | |
| | <1.00 Gya | <1.00 Gya |  |  | *D. melanogaster* | | | --- | --- | --- | --- | --- | --- | | 1.00~1.58 Gya | 0.3734 | 1.00~1.58 Gya |  | | 1.58~1.84 Gya | 4.1603×10-6 | 4.0548×10-4 | 1.58~1.84 Gya |  |  | | 1.84~2.23 Gya | 1.4249×10-25 | 1.6549×10-20 | 6.2335×10-7 | 1.84~2.23 Gya |  | | 2.23~4.00 Gya | 1.0179×10-49 | 2.6389×10-45 | 8.7714×10-27 | 2.2791×10-14 | 2.23~4.00 Gya | | >4.00 Gya | 3.2014×10-40 | 1.3495×10-35 | 1.4634×10-16 | 1.6495×10-5 | 3.4569×10-4 | |
| | <1.00 Gya | <1.00 Gya |  |  | *C. elegans* | | | --- | --- | --- | --- | --- | --- | | 1.00~1.58 Gya | 0.9155 | 1.00~1.58 Gya |  | | 1.58~1.84 Gya | 0.6543 | 0.7815 | 1.58~1.84 Gya |  |  | | 1.84~2.23 Gya | 2.5047×10-4 | 0.0061 | 0.0321 | 1.84~2.23 Gya |  | | 2.23~4.00 Gya | 3.2318×10-52 | 5.4992×10-34 | 2.0437×10-30 | 2.9647×10-31 | 2.23~4.00 Gya | | >4.00 Gya | 1.5074×10-49 | 3.9685×10-28 | 3.3125×10-24 | 8.6281×10-24 | 2.2521×10-4 | |
| | <1.21 Gya | <1.21 Gya |  |  | *S. cerevisiae* | | | --- | --- | --- | --- | --- | --- | | 1.21~1.58 Gya | 0.0101 | 1.21~1.58 Gya |  | | 1.58~1.84 Gya | 4.3123×10-9 | 1.6946×10-4 | 1.58~1.84 Gya |  |  | | 1.84~2.23 Gya | 4.4792×10-12 | 3.7149×10-6 | 0.9589 | 1.84~2.23 Gya |  | | 2.23~4.00 Gya | 4.5218×10-49 | 1.9482×10-41 | 1.4451×10-15 | 3.4722×10-22 | 2.23~4.00 Gya | | >4.00 Gya | 1.4159×10-35 | 4.4116×10-27 | 1.5614×10-7 | 4.9056×10-11 | 4.9019×10-4 | |
| | <2.60 Gya | <2.60 Gya | *E. coli* | | --- | --- | --- | | 2.60~4.00 Gya | 0.7674 | 2.60~4.00 Gya | | >4.00 Gya | 2.0570×10-4 | 0.0017 | |
