# Supplementary material for: Regular Patterns for Proteome-Wide Distribution of Protein Abundance across Species
Source: PLoS One. 2012 Mar 9;7(3):e32423. doi: 10.1371/journal.pone.0032423 (PMC3302874; doi:10.1371/journal.pone.0032423)
Supplement: Table S4 — Rank sum test p-values between various functional categorized proteins' abundance datasets across six species. (DOC) [file pone.0032423.s009.doc]

**Supplementary Table 4. Rank sum test *p*-values between various functional categorized proteins’ abundance datasets across six species.**

| Response to  Stimulus | Response to  Stimulus |  |  | *H. sapiens* (Liver) | | |
| --- | --- | --- | --- | --- | --- | --- |
| Signal  Transduction | 1.3627×10-14 | Signal  Transduction |  |
| Transcription | 8.6899×10-20 | 0.0763 | Transcription |
| Translation | 0.0245 | 1.0983×10-11 | 5.1723×10-16 | Translation |  |  |
| Carbohydrate  Metabolism | 8.8976×10-5 | 1.0719×10-19 | 6.5699×10-24 | 0.3421 | Carbohydrate  Metabolism |  |
| Metabolite or  Energy Metabolism | 7.9695×10-17 | 1.6281×10-45 | 1.3306×10-50 | 1.3307×10-4 | 0.0066 | Metabolite or  Energy Metabolism |
| AA. Metabolism | 3.5641×10-10 | 4.7201×10-29 | 1.7518×10-34 | 0.0037 | 0.0321 | 0.6740 |

| Response to  Stimulus | Response to  Stimulus |  |  | *M. musculus* (Renal cortex) | | |
| --- | --- | --- | --- | --- | --- | --- |
| Signal  Transduction | 0.4337 | Signal  Transduction |  |
| Transcription | 0.0250 | 0.0908 | Transcription |
| Translation | 1.5265×10-5 | 1.9798×10-8 | 1.6638×10-10 | Translation |  |  |
| Carbohydrate  Metabolism | 2.0311×10-4 | 3.2379×10-6 | 1.8469×10-7 | 0.6147 | Carbohydrate  Metabolism |  |
| Metabolite or  Energy Metabolism | 1.2169×10-6 | 1.3066×10-8 | 1.2375×10-9 | 0.0030 | 0.0541 | Metabolite or  Energy Metabolism |
| AA. Metabolism | 0.0125 | 6.0159×10-4 | 1.8958×10-5 | 0.3508 | 0.2505 | 0.0024 |

| Response to  Stimulus | Response to  Stimulus |  |  | *M. musculus* (Liver) | | |
| --- | --- | --- | --- | --- | --- | --- |
| Signal  Transduction | 1.9218×10-5 | Signal  Transduction |  |
| Transcription | 0.2910 | 0.0020 | Transcription |
| Translation | 6.2621×10-18 | 1.8038×10-40 | 1.5379×10-23 | Translation |  |  |
| Carbohydrate  Metabolism | 5.4986×10-7 | 2.8319×10-19 | 3.9160×10-10 | 0.0042 | Carbohydrate  Metabolism |  |
| Metabolite or  Energy Metabolism | 9.2518×10-7 | 4.8921×10-15 | 7.0257×10-10 | 0.2557 | 0.2709 | Metabolite or  Energy Metabolism |
| AA. Metabolism | 6.4307×10-9 | 1.4276×10-19 | 9.7688×10-12 | 0.5321 | 0.1259 | 0.7300 |

| Response to  Stimulus | Response to  Stimulus |  |  | *D. melanogaster* | | |
| --- | --- | --- | --- | --- | --- | --- |
| Signal  Transduction | 0.0079 | Signal  Transduction |  |
| Transcription | 0.6679 | 0.2821 | Transcription |
| Translation | 0.5032 | 0.0036 | 0.3180 | Translation |  |  |
| Carbohydrate  Metabolism | 0.9336 | 0.0013 | 0.5750 | 0.4934 | Carbohydrate  Metabolism |  |
| Metabolite or  Energy Metabolism | 0.0070 | 1.5912×10-7 | 0.0237 | 0.0555 | 0.0022 | Metabolite or  Energy Metabolism |
| AA. Metabolism | 0.0277 | 7.1310×10-8 | 0.1030 | 0.3084 | 0.0099 | 0.1845 |

| Response to  Stimulus | Response to  Stimulus |  |  | *C. elegans* | | |
| --- | --- | --- | --- | --- | --- | --- |
| Signal  Transduction | 1.7676×10-5 | Signal  Transduction |  |
| Transcription | 0.5893 | 0.0058 | Transcription |
| Translation | 8.0175×10-18 | 5.3911×10-27 | 3.9228×10-5 | Translation |  |  |
| Carbohydrate  Metabolism | 6.7792×10-7 | 2.5391×10-14 | 0.0202 | 2.1247×10-4 | Carbohydrate  Metabolism |  |
| Metabolite or  Energy Metabolism | 7.0703×10-7 | 1.6611×10-10 | 2.8455×10-4 | 0.8412 | 0.0193 | Metabolite or  Energy Metabolism |
| AA. Metabolism | 2.0422×10-5 | 2.7123×10-13 | 0.0514 | 1.9169×10-6 | 0.4062 | 0.0025 |

| **Response to Stimulus** | **Response to Stimulus** |  |  |  | *S. cerevisiae* | | | |
| --- | --- | --- | --- | --- | --- | --- | --- | --- |
| **Signal Transduction** | **0.0278** | **Signal Transduction** |  |  |
| **Transcription** | **0.0049** | **0.7862** | **Transcription** |  |
| **Translation** | **1.1086×10-27** | **3.1269×10-21** | **2.1930×10-36** | **Translation** |
| **Meiosis** | **1.9589×10-4** | **0.0312** | **0.0092** | **2.9744×10-16** | **Meiosis** |  |  |  |
| **Cytokinesis** | **0.8842** | **0.3829** | **0.4400** | **4.2287×10-5** | **0.0359** | **Cytokinesis** |  |  |
| **Carbohydrate**  **Metabolism** | **1.2972×10-5** | **3.1019×10-7** | **1.2712×10-10** | **1.4775×10-7** | **1.5366×10-8** | **0.0673** | **Carbohydrate**  **Metabolism** |  |
| **Metabolite or**  **Energy Metabolism** | **7.2801×10-4** | **8.6075×10-6** | **4.3495×10-8** | **8.4875×10-9** | **1.0604×10-7** | **0.1411** | **0.4395** | **Metabolite or**  **Energy Metabolism** |
| **AA. Metabolism** | **1.6297×10-9** | **1.9251×10-10** | **1.2952×10-15** | **1.6654×10-4** | **1.2537×10-10** | **0.0106** | **0.1336** | **0.0319** |

| Response to  Stimulus | Response to  Stimulus |  |  | *E. coli* | | |
| --- | --- | --- | --- | --- | --- | --- |
| Signal  Transduction | 6.7873×10-4 | Signal  Transduction |  |
| Transcription | 0.3812 | 4.2946×10-4 | Transcription |
| Translation | 3.7314×10-15 | 1.8346×10-4 | 4.8102×10-15 | Translation |  |  |
| Carbohydrate  Metabolism | 0.0644 | 6.9960×10-4 | 0.3604 | 1.7590×10-22 | Carbohydrate  Metabolism |  |
| Metabolite or  Energy Metabolism | 0.6320 | 0.0015 | 0.7739 | 2.0942×10-15 | 0.2438 | Metabolite or  Energy Metabolism |
| AA. Metabolism | 0.1450 | 4.8485×10-4 | 0.8546 | 1.1460×10-24 | 0.2849 | 0.5442 |
